# Supplementary material
Source: publisher figshare collection journal article supplement (https://tandf.figshare.com/articles/dataset/_/12430124)
Supplement: Supplementary file 1 [file 1]

Archive with 3 entries (3 files):
- iija_a_1771621_sm5902.pdf
- iija_a_1771621_sm5901.docx
- iija_a_1771621_sm5900.docx
