# Supplementary material
Source: publisher figshare collection journal article supplement (https://tandf.figshare.com/articles/dataset/_/12430124)
Supplement: Supplementary file 1 [file 1 › iija_a_1771621_sm5900.docx]

# APPENDIX 1. PRE-APPOINTMENT QUESTIONNAIRE

## *The following is a list of relevant and reported items from the questionnaire, some items have been excluded for brevity.*

## YOU AND YOUR HEARING

#### What is your gender? ( ) Female

#### ( ) Male

#### ( ) Indeterminate/intersex/unspecified

#### What is your date of birth?

#### Tinnitus is defined as any sound that a person can hear internally that is not present externally. It may be heard as a buzzing, ringing, whistling, hissing or pulsing sound. Have you ever experienced tinnitus?

#### ( ) Never/almost never

#### ( ) Occasionally

#### ( ) Sometimes

#### ( ) Frequently

#### ( ) Always/almost always

#### ( ) Unsure

#### [If present]

#### How would you rate the severity of your tinnitus?

#### ( ) Mild

#### ( ) Moderate

#### ( ) Severe

#### Have you ever experienced the following or a worsening of the following after a performance or rehearsal? (select all that apply)

#### ( ) Ringing in the ear (tinnitus)

#### ( ) Hearing dullness

#### ( ) Blocked sensation in the ears

#### ( ) Pain in the ears

#### ( ) Sound distortion

#### ( ) Other (please describe):

#### ( ) None of the above

## YOUR WORK AND TRAINING

**How would you describe your work in the music industry?**

( ) Professional (full-time)

( ) Professional ( part-time)

( ) Freelance

( ) Amateur/recreational

( ) Other (please describe):

**What instrument(s) do you play?**

**What music genre/s do you mostly play?**

**Have you completed or are you enrolled in any music-related training?**

( ) Yes (please describe):

( ) No

**On average, how many times do you perform each month?**

( ) About once a month

( ) 1-5 times a month

( ) 5-10 times a month

( ) More than 10 times a month

**Please describe the various roles you perform as a musician (i.e. performer, teacher, writer).**

**HEARING PROTECTION**

**Do you believe your hearing is at risk working as a musician?**

( ) Yes

( ) No

( ) Unsure

**Have you worn hearing protectors before?**

( ) Yes

( ) No

[If yes]

**Please describe why (select all that apply)**

( ) I haven’t thought about it before

( ) I’m not at risk of hearing damage

( ) The risk of hearing damage is part of the job

( ) Earplugs are uncomfortable

( ) Earplugs prevent me from being able to do my job

( ) Earplugs are a hassle

( ) Earplugs are too noticeable

( ) Custom-made earplugs are too expensive

( ) Other (please describe):

**How often would you wear hearing protectors?**

( ) Never/almost never (less than 10% of the time)

( ) Occasionally ( less than 50% of the time)

( ) Sometimes (around 50% of the time)

( ) Frequently (more than 50% of the time)

( ) Almost always/always (more than 90% of the time)

**Have you always worn hearing protectors in music?**

( ) Yes

( ) No

**Why did you start to use hearing protectors?**

**What type of hearing protectors have you worn? (select all that apply)**

( ) Tissue/cotton wool in the ear

( ) Foam earplugs

( ) Non-custom, filtered earplugs

( ) Custom-made earplugs

( ) Custom-made vented earplugs

( ) Custom-made electronic earplugs

( ) In-ear monitors

( ) Custom in-ear monitors

( ) Acoustic screens

( ) Other (please describe):

( ) None of the above

**Please describe the situation(s) you have worn hearing protectors in (e.g. when performing).**

**Why do you choose, or would you choose, to wear hearing protectors? (select all that apply)**

( ) To protect my ears from hearing loss

( ) To protect my ears from tinnitus

( ) I have hearing loss and I don’t want it to get worse

( ) I have tinnitus and I don’t want it to get worse

( ) To reduce the severity of my hearing-related symptoms after a shift ( rehearsal/performance)

( ) My boss requires me to do so

( ) Other:

**Before we leave you, your opinion is very important to us. Is there anything else you’d like to tell us?**
