# Supplementary material
Source: publisher figshare collection journal article supplement (https://tandf.figshare.com/articles/dataset/_/12430124)
Supplement: Supplementary file 1 [file 1 › iija_a_1771621_sm5901.docx]

# APPENDIX 2. EXIT-INTERVIEW QUESTIONNAIRE

## *The following is a list of relevant and reported items from the questionnaire, some items have been excluded for brevity.*

## HEARING PROTECTION USE

#### How useful did you find your hearing protectors overall?

( ) Very useful

( ) Somewhat useful

( ) Not very useful

( ) Not at all useful

### In which situation(s) did you find your hearing protectors most useful?

### In which situation(s) did you find your hearing protectors least useful?

### Did you experience any difficulties with the use of your hearing protectors (i.e. discomfort, made sounds too soft etc.)?

### Did you experience any benefits to the use of your hearing protectors (i.e. experienced less tinnitus after a show)?

### Did you require any modifications to your hearing protectors (i.e. change in filter or mould)?

#### How satisfied are you with the fit of your hearing protectors (i.e. comfort, retention etc.)?

( ) Very satisfied

( ) Somewhat satisfied

( ) Neither satisfied nor dissatisfied

( ) Somewhat dissatisfied

( ) Very dissatisfied

#### How satisfied are you with the sound quality of your hearing protectors (i.e. ability to hear your instrument, blend with others etc.)?

( ) Very satisfied

( ) Somewhat satisfied

( ) Neither satisfied nor dissatisfied

( ) Somewhat dissatisfied

( ) Very dissatisfied

#### How satisfied are you with your hearing protectors overall?

( ) Very satisfied

( ) Somewhat satisfied

( ) Neither satisfied nor dissatisfied

( ) Somewhat dissatisfied

( ) Very dissatisfied

## SERVICE DELIVERY

#### How satisfied were you with your hearing appointments?

( ) Very satisfied

( ) Somewhat satisfied

( ) Neither satisfied nor dissatisfied

( ) Somewhat dissatisfied

( ) Very dissatisfied

#### Did you feel you received adequate information on your hearing and music exposure to inform your decision on hearing protectors?

( ) Very satisfied

( ) Somewhat satisfied

( ) Neither satisfied nor dissatisfied

( ) Somewhat dissatisfied

( ) Very dissatisfied

**Out of the hearing appointments, what did you find most useful?**

**Was there anything you believe could have been done better?**

**Would you recommend the use of hearing protectors to a colleague or friend?**

( ) Yes

( ) No

( ) Unsure

**In general, what do you think could be done to help protect the hearing of musicians in the music industry?**

**Before we leave you, your opinion is very important to us. Is there anything else you’d like to tell us?**
