# Supplementary material
Source: publisher figshare collection journal article supplement (https://tandf.figshare.com/articles/dataset/_/12430124)
Supplement: Supplementary file 1 [file 1 › iija_a_1771621_sm5902.pdf]

**Client:** \_\_\_\_\_

**Audiologist:** \_\_\_\_\_

**Hearing Protection:** \_\_\_\_\_

**Goals set:** \_\_\_\_\_

**Follow-up:** \_\_\_\_\_

*Please select the dates from the drop-down calendar on the right.*

## Listening Situations

*Number in order of priority*

*Follow-up \**

|                          |  |
|--------------------------|--|
| <input type="checkbox"/> |  |

\*At the follow-up appointment record the proportion of time plugs/devices/strategies have been employed listening situation.

## Hearing Protection Goals

*Number in order of priority*

*Follow-up \*\**

|                          |  |
|--------------------------|--|
| <input type="checkbox"/> |  |

\*\*At the follow-up appointment record the extent to which *Hearing Protection Goals* have been addressed using this scale:

**Not at all: 0 Partially: 1 Mostly: 2 Completely: 3 Exceeded: 4**

## Comments

---



---



---



---
